# Supplementary material for: Detection of Tetrodotoxin Shellfish Poisoning (TSP) Toxins and Causative Factors in Bivalve Molluscs from the UK
Source: PubMed Central journal article supplement (PMC5618416; doi:10.3390/md15090277), 2017-08-30

Figure S1. Structures of selected Tetrodotoxin analogues

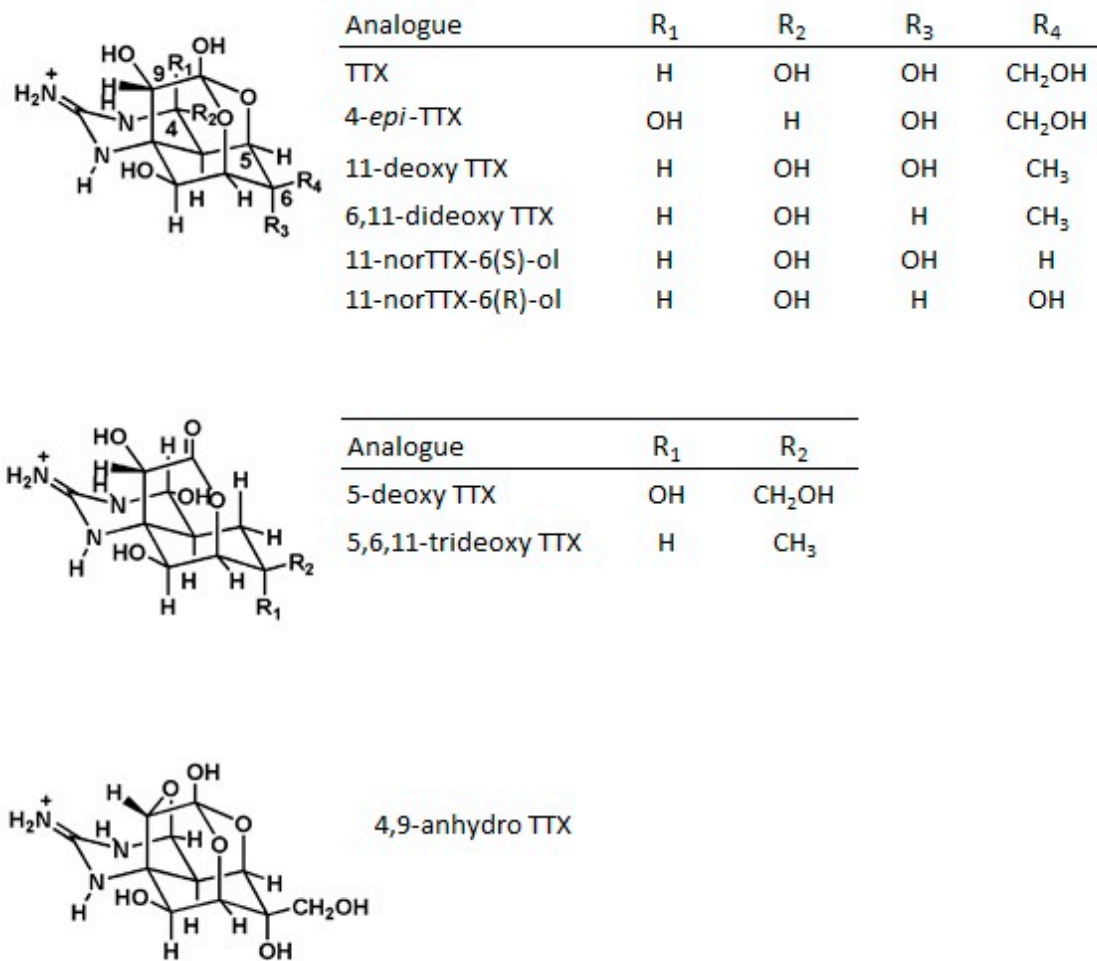

**Figure S2.** Map of UK showing location of shellfish samples taken during this study (blue dots)

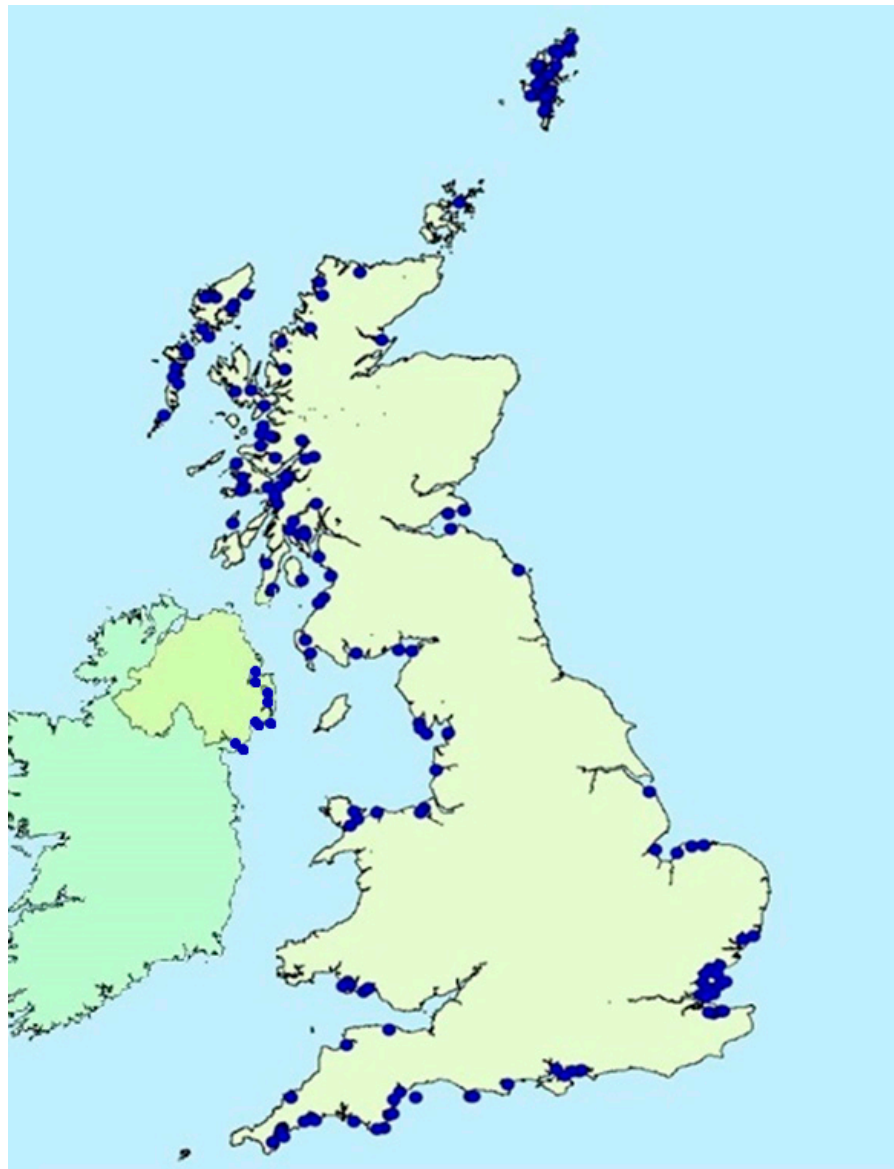

Supplement: marinedrugs-15-00277-s001.pdf [file marinedrugs-15-00277-s001.pdf]
